# Supplementary material for: Modulation of serotonin in the gut-liver neural axis ameliorates the fatty and fibrotic changes in non-alcoholic fatty liver
Source: PubMed Central journal article supplement (PMC8084356; doi:10.1242/dmm.048922), 2021-03-28
Supplement: dmm-14-048922-s1.pdf [file dmm-14-048922-s1.pdf]

Figure S1

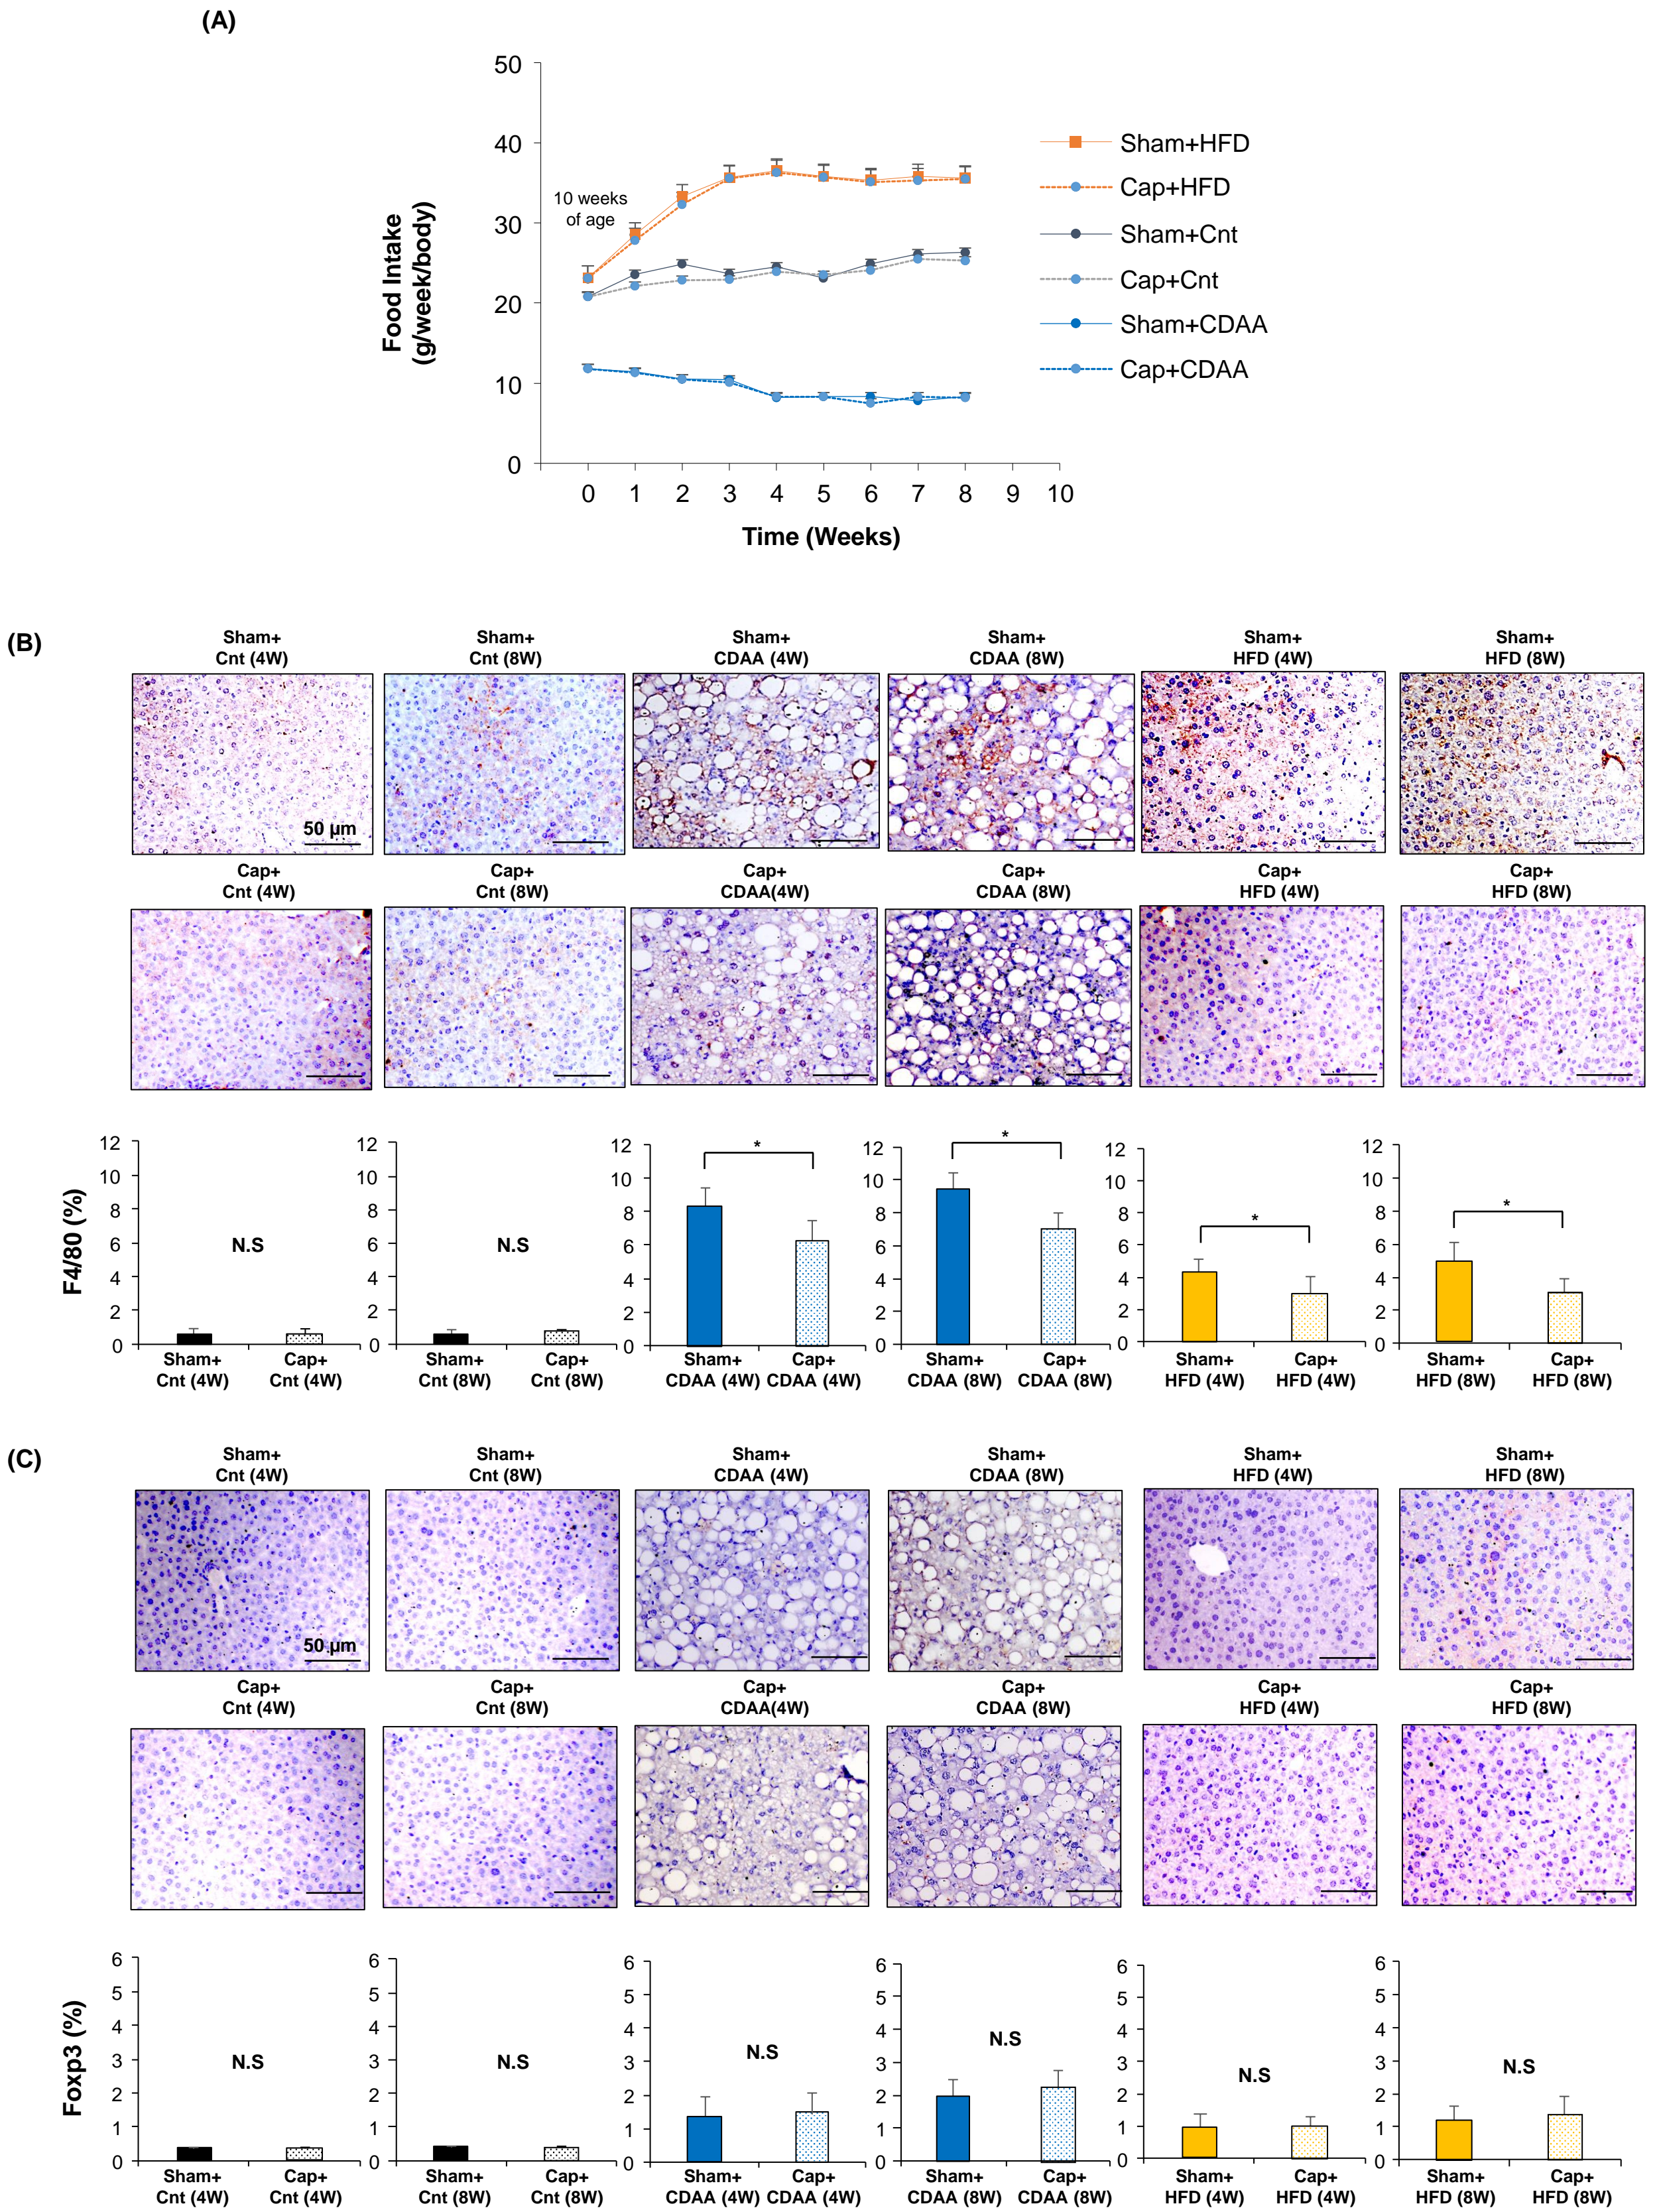

**Fig. S1. Effect of autonomic neural signal transduction on inflammation in the liver of NAFLD/NASH mice models.**

(A) Changes of food consumption. The values represent mean  $\pm$  SD ( $n = 5$  for each group).

(B) Representative images of F4/80 and Foxp3 (C) staining of the liver of mice groups. Scale bar represents 100  $\mu$ m. Five different sections from each of the five mice ( $n = 25$ ) in all groups were quantitatively analyzed for the positively stained area using ImageJ software. The values represent mean  $\pm$  SD ( $n = 25$  for each group), NS, no statistical significance. Student's  $t$ -test.

Figure S2

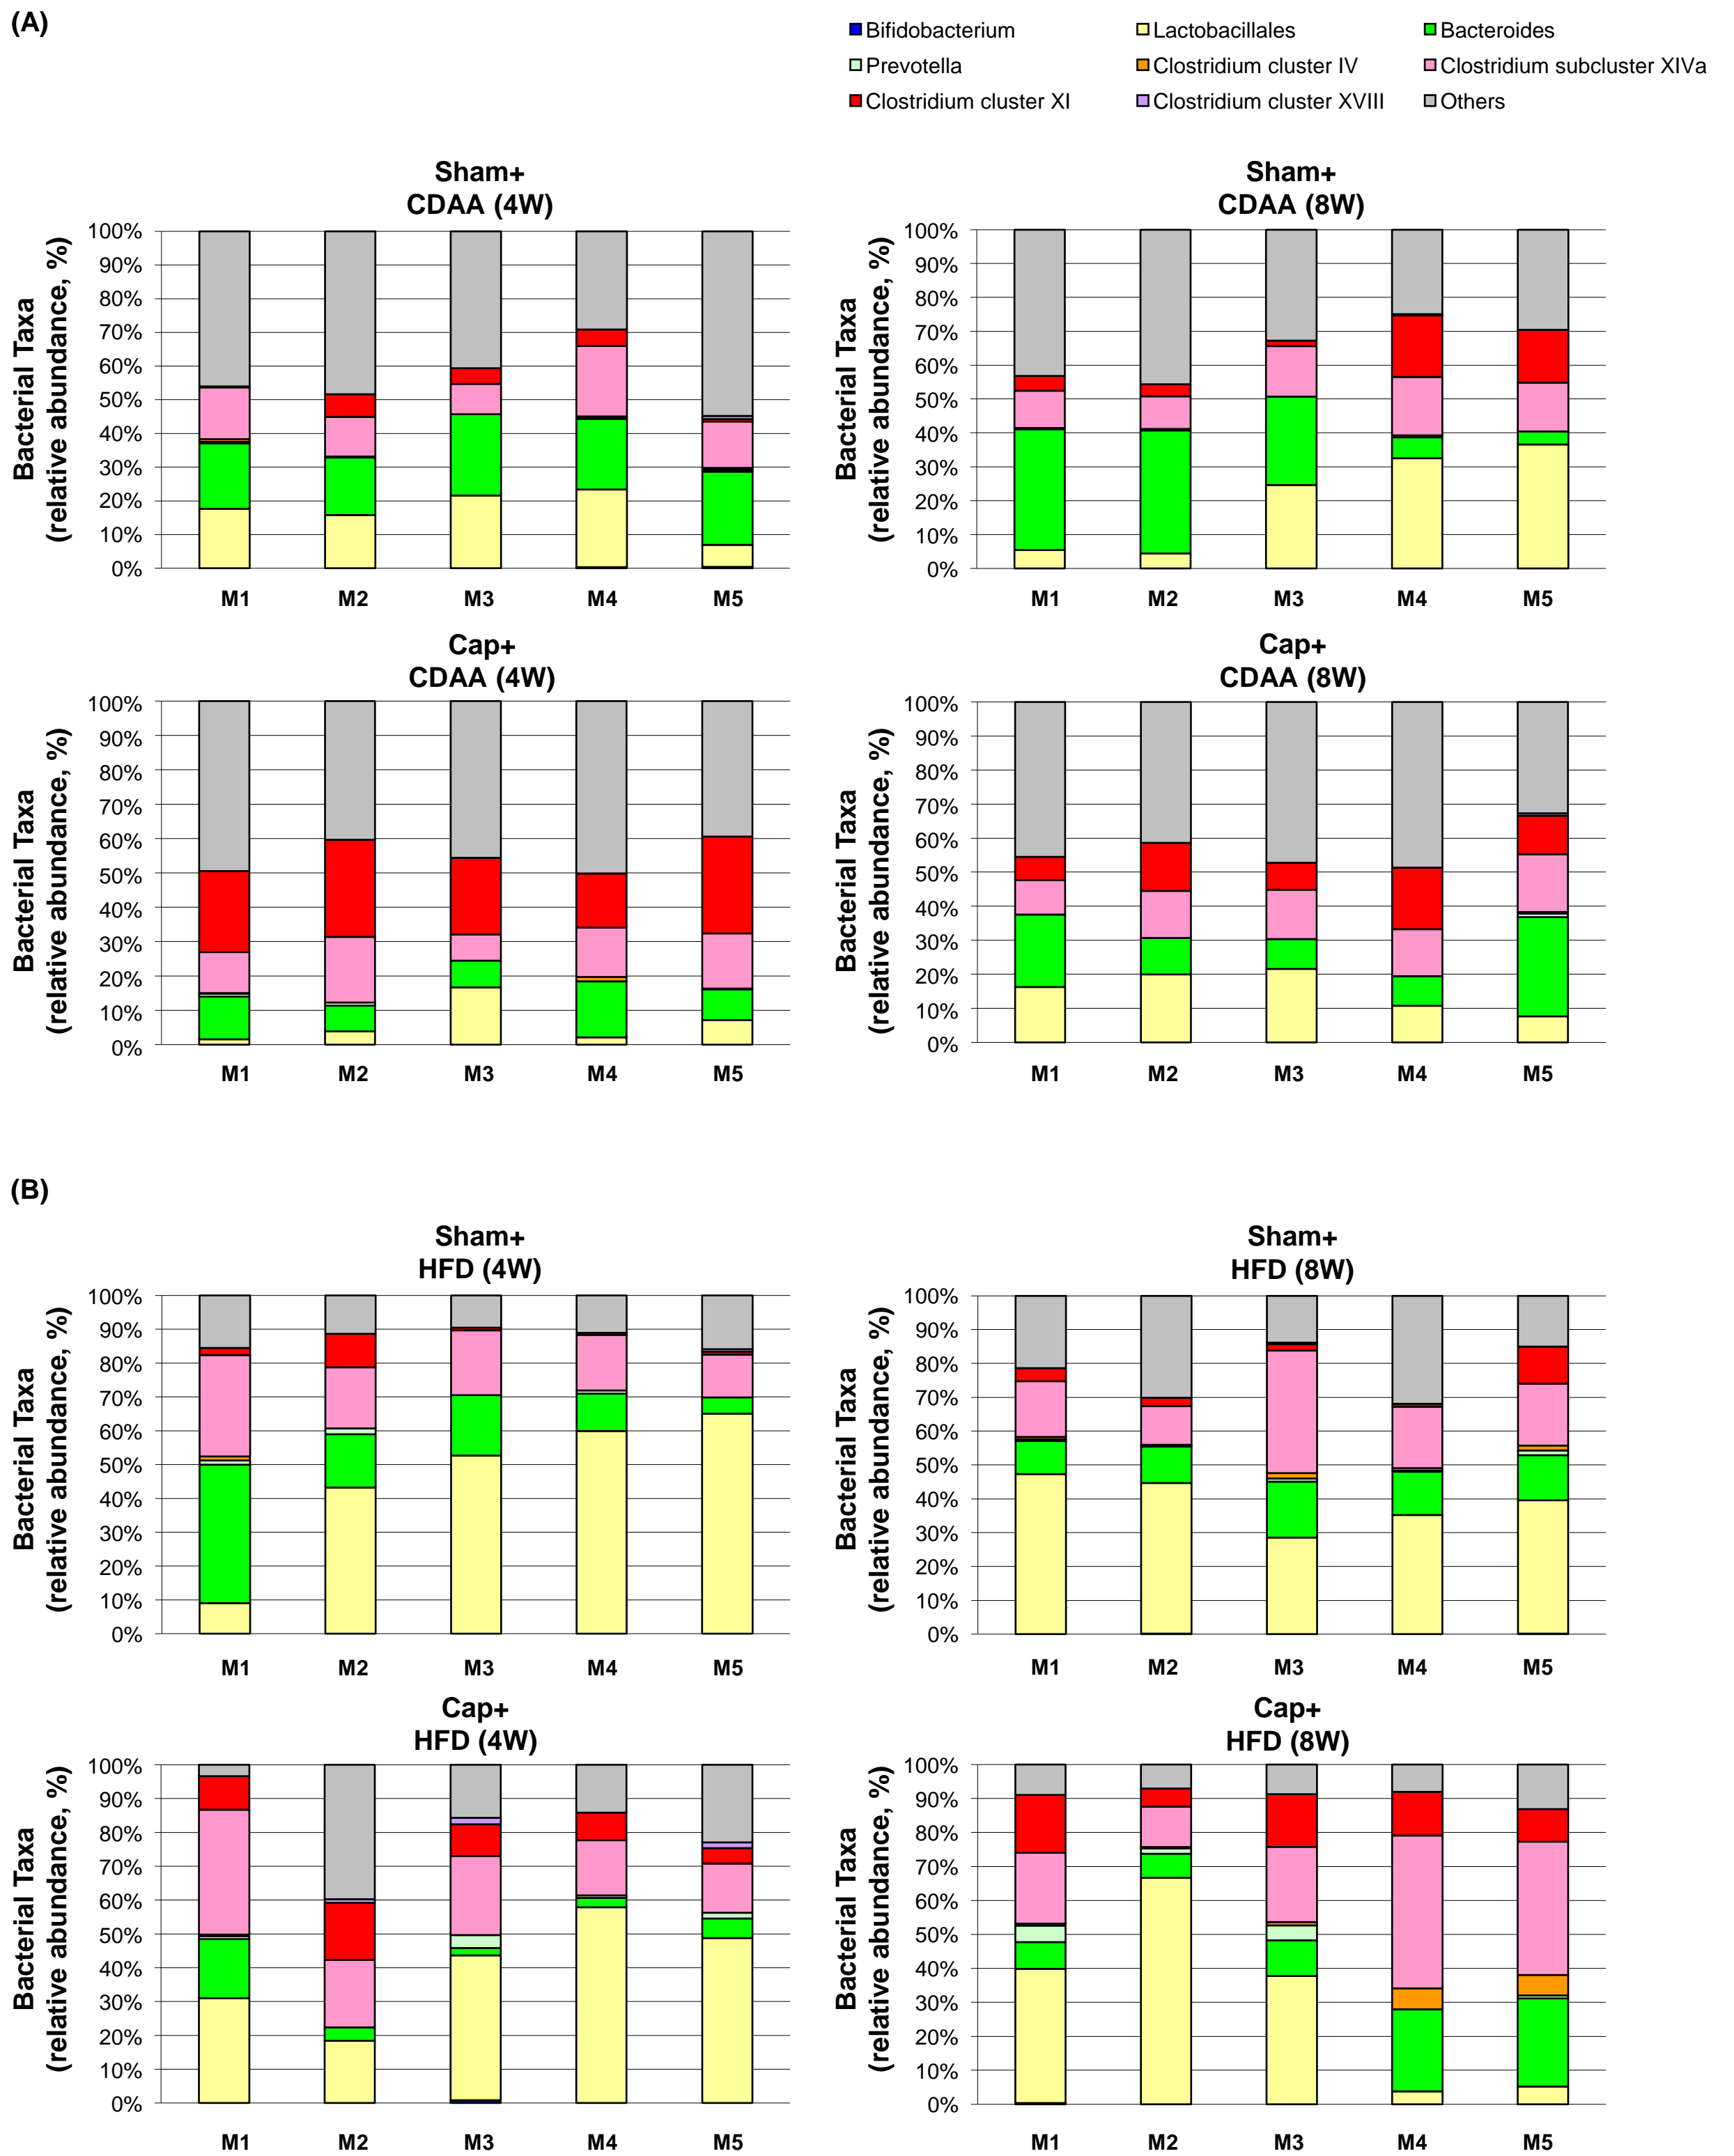

**Fig. S2. Taxonomic distribution of microbiota.** (A) Choline-deficient defined L-amino-acid (CDAA) diet-fed and (B) high-fat (HFD) diet-fed NAFLD model mice with or without autonomic nerve blockade. Values represent the average relative abundance across all samples within the indicated group (n=5, M1 represents Mouse #1).

Figure S3

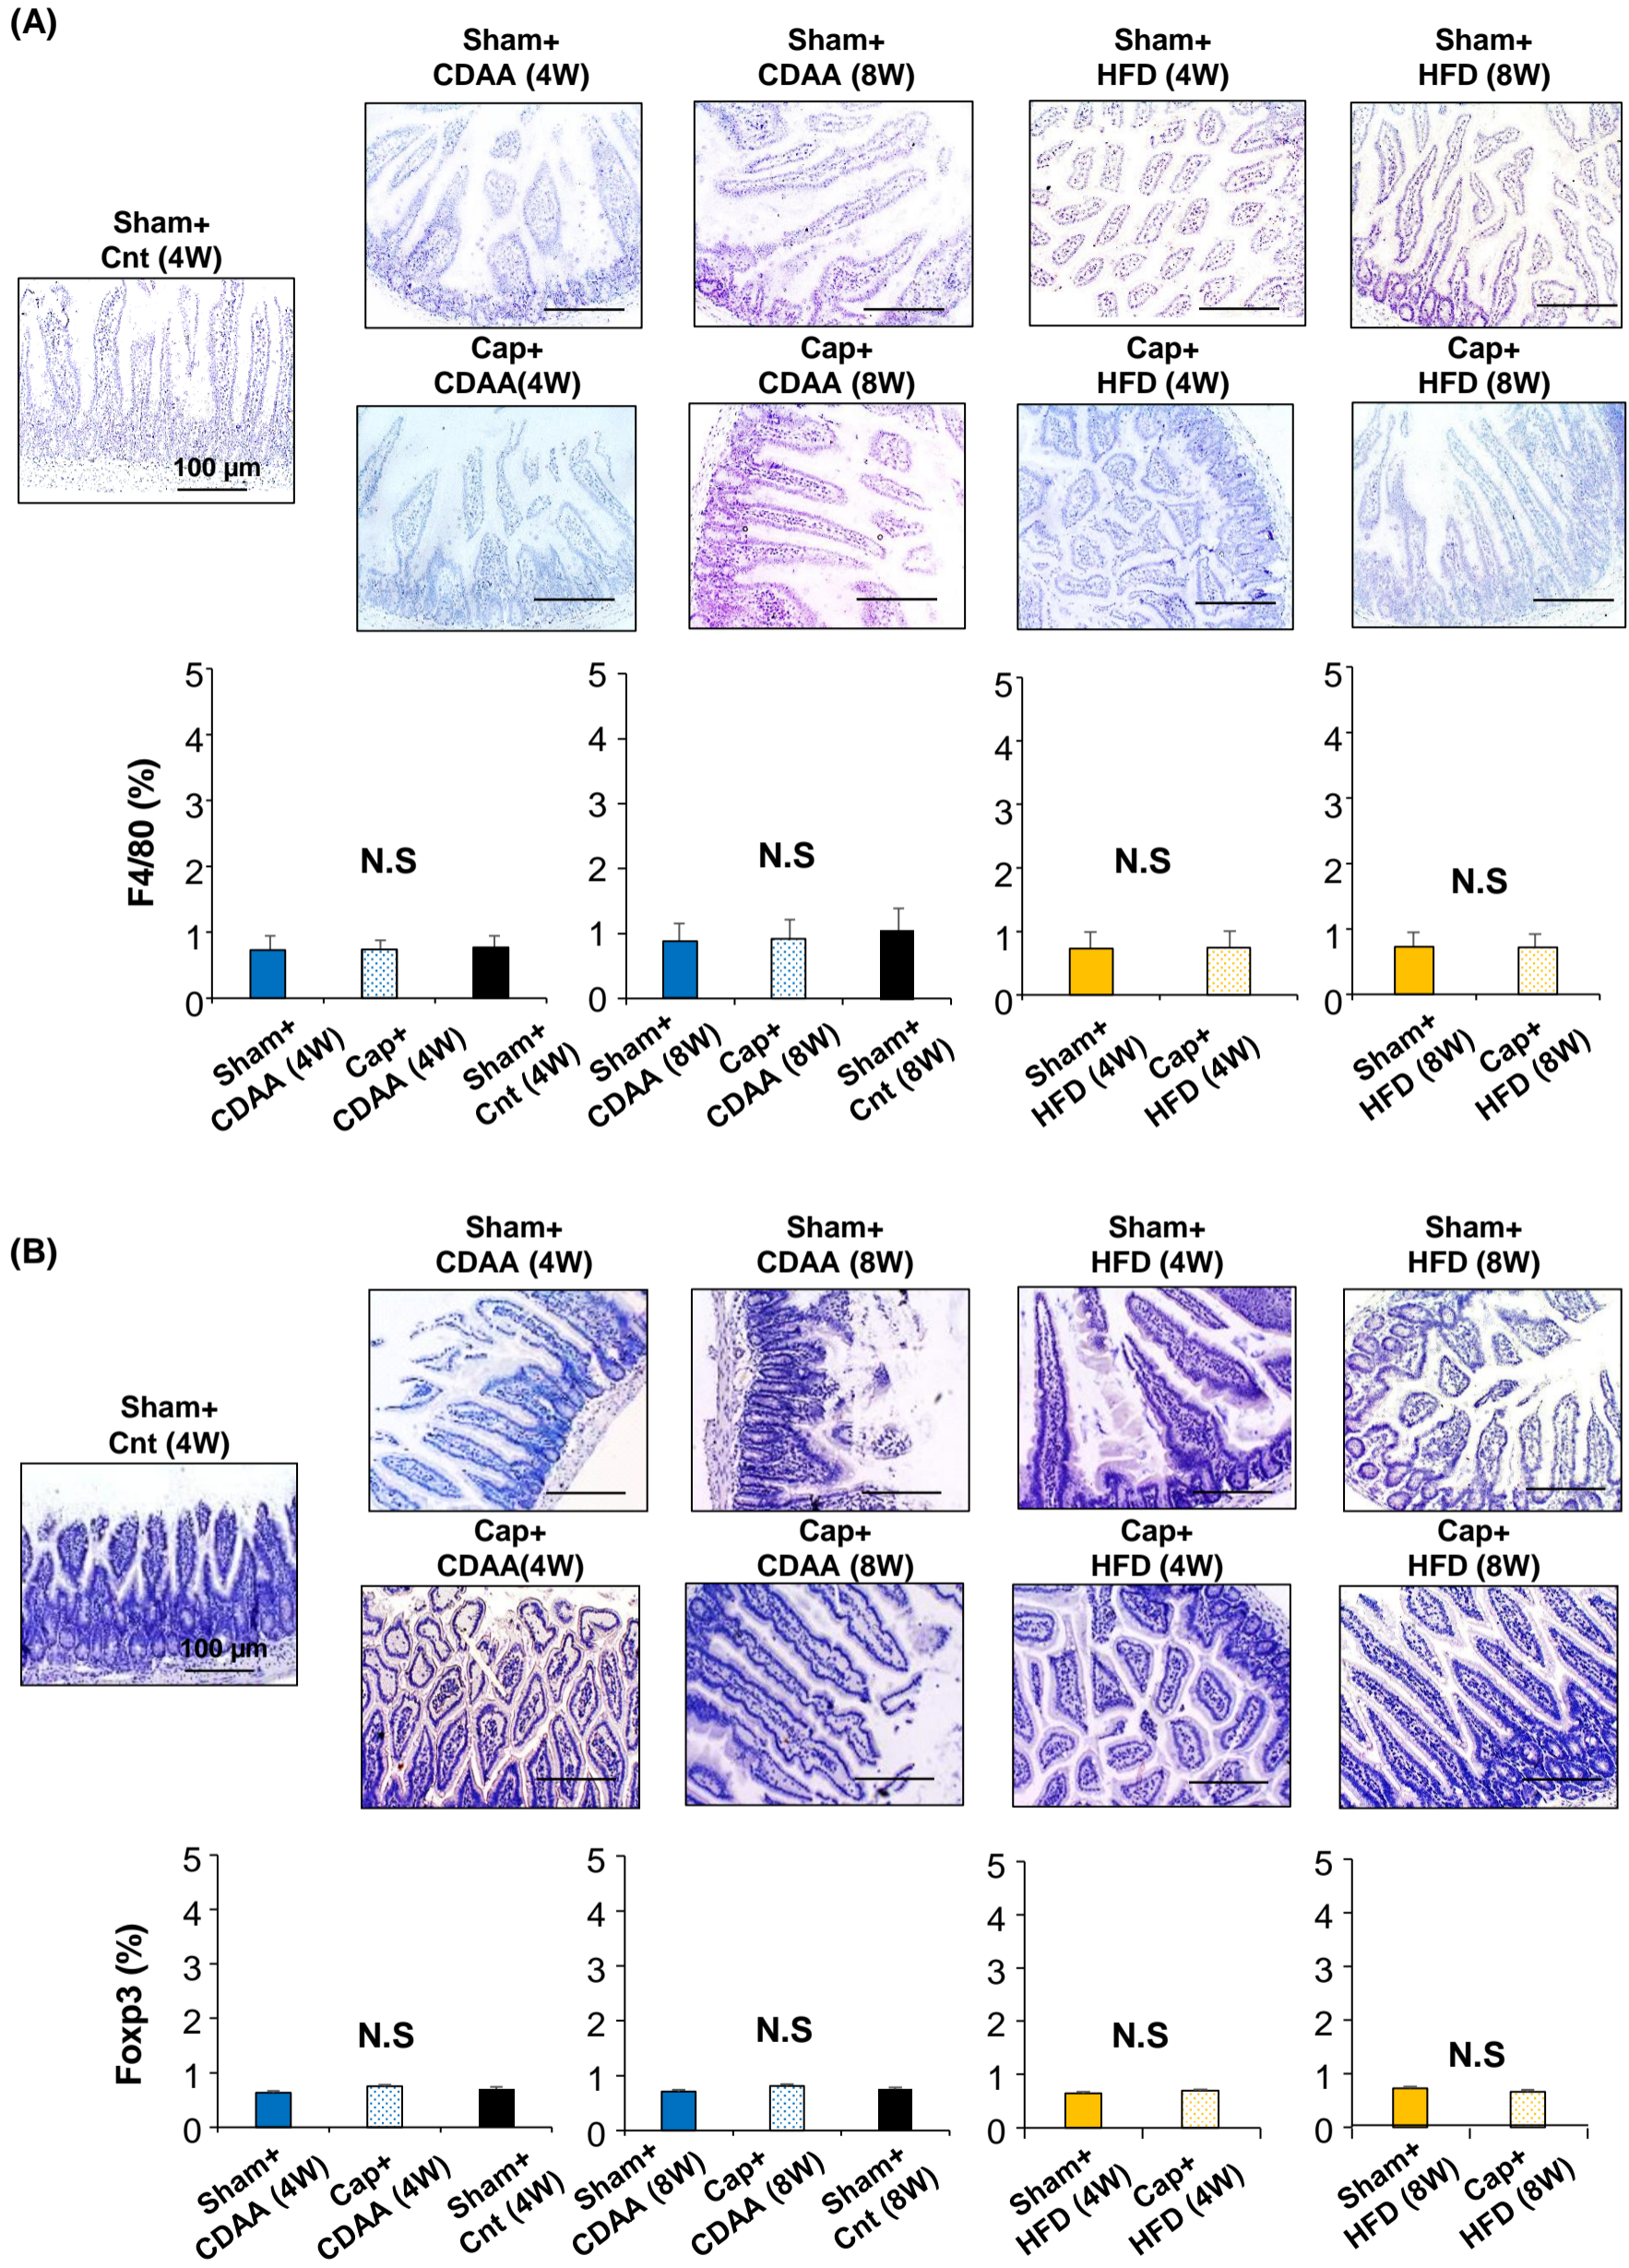

**Fig. S3. Effect of autonomic neural signal transduction on small intestine inflammation of NAFLD/NASH mice models.** Representative images of F4/80 (A) and Foxp3 (B) staining of the small intestine of mice groups. Scale bar represents 100  $\mu$ m. Five different sections from each of the five mice ( $n = 25$ ) in all groups were quantitatively analyzed for the positively stained area using ImageJ software. The values represent mean  $\pm$  SD ( $n = 25$  for each group), NS, no statistical significance. Student's  $t$ -test.
